# Supplementary figures and images for: Inducing tumor ferroptosis via a pH-responsive NIR-II photothermal agent initiating lysosomal dysfunction
Source: Royal Society of Chemistry journal article supplement (doi:10.1039/d3nr04124g), 2023-01-01

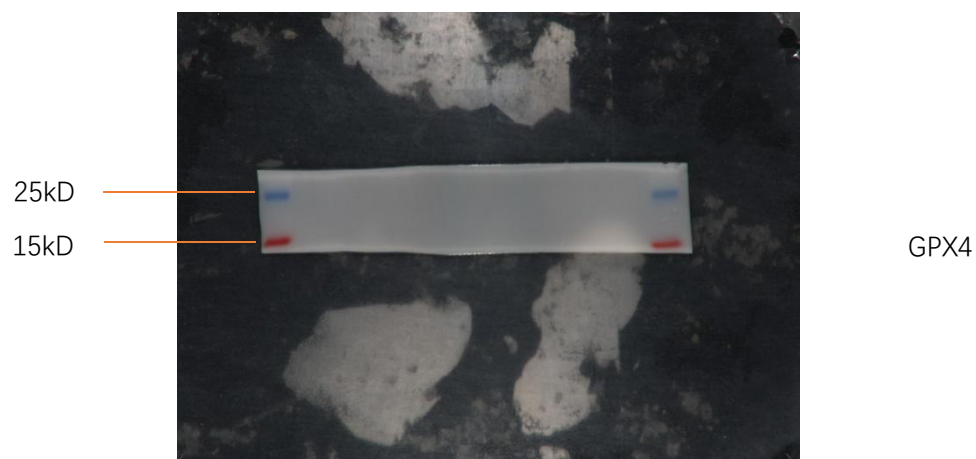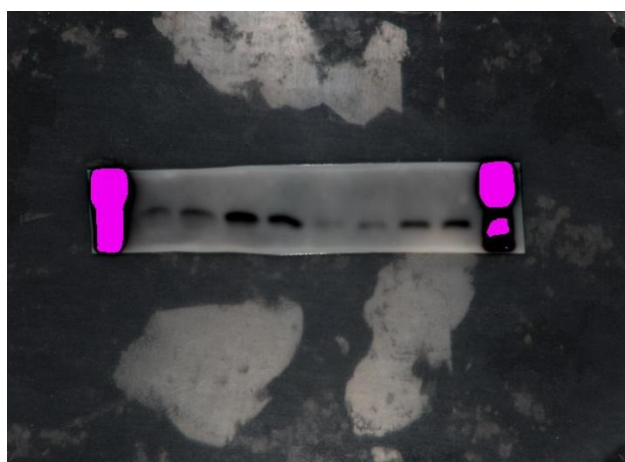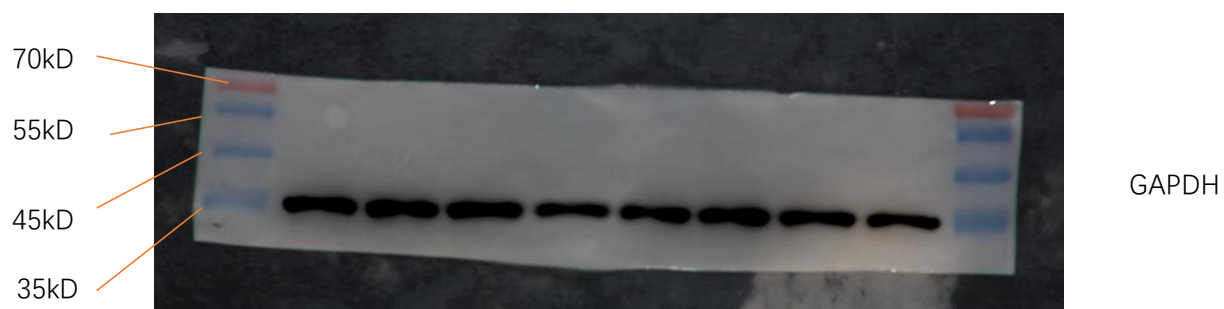

Supplement: d3nr04124g2.pdf [file d3nr04124g2.pdf]
